# Supplementary material
Source: Springer Nature journal article supplement (https://www.springermedizin.de/resource/supplementary/12885_2010_2682_MOESM6_ESM.pdf/9461712)

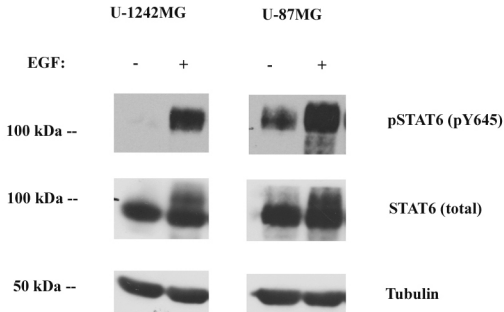

**EGF: 50 ng/mL, 10 min.**

Supplement: MOESM6 [file 9461712]
